# Supplementary material for: Architecture and Dynamics of the Wounding-Induced Gene Regulatory Network During the Oolong Tea Manufacturing Process (Camellia sinensis)
Source: Front Plant Sci. 2022 Jan 27;12:788469. doi: 10.3389/fpls.2021.788469 (PMC8829136; doi:10.3389/fpls.2021.788469)
Supplement: Supplementary file 2 [file Table_1.XLSX]

## Sheet: Sheet1
Supplementary Dataset 1：RNA-seq statistical table
Sample	RawData(bp)	BF_Q20(%)	BF_Q30(%)	BF_N(%)	BF_GC(%)	CleanData(bp)	AF_Q20(%)	AF_Q30(%)	AF_N(%)	AF_GC(%)
Y-10-1	6103986300	5942165024 (97.35%)	5662545040 (92.77%)	185945 (0.00%)	2689612260 (44.06%)	6029421694	5884254170 (97.59%)	5611870450 (93.07%)	122464 (0.00%)	2642220643 (43.82%)
Y-10-2	6129129900	5965478003 (97.33%)	5683698972 (92.73%)	187759 (0.00%)	2696503671 (43.99%)	6059125027	5911699949 (97.57%)	5636719429 (93.03%)	123437 (0.00%)	2651054730 (43.75%)
Y-10-3	6740429400	6583187706 (97.67%)	6286190504 (93.26%)	71935 (0.00%)	2967958882 (44.03%)	6633800674	6497191466 (97.94%)	6209651458 (93.61%)	69695 (0.00%)	2896474498 (43.66%)
Y-120-1	6714785700	6572100590 (97.88%)	6313513435 (94.02%)	41191 (0.00%)	2984735180 (44.45%)	6592423284	6473236968 (98.19%)	6226724926 (94.45%)	40393 (0.00%)	2898182247 (43.96%)
Y-120-2	6983227500	6835872778 (97.89%)	6566716266 (94.04%)	43228 (0.00%)	3094833769 (44.32%)	6865514726	6742748166 (98.21%)	6485226896 (94.46%)	42517 (0.00%)	3011754164 (43.87%)
Y-120-3	5897602200	5738272960 (97.30%)	5471071188 (92.77%)	182160 (0.00%)	2615865846 (44.35%)	5788896499	5650401962 (97.61%)	5394451118 (93.19%)	117294 (0.00%)	2540553338 (43.89%)
Y-160-1	6969872700	6789452709 (97.41%)	6481000957 (92.99%)	214330 (0.00%)	3083528951 (44.24%)	6882853196	6720617313 (97.64%)	6420839049 (93.29%)	138949 (0.00%)	3027992062 (43.99%)
Y-160-2	6844448700	6664001794 (97.36%)	6356426872 (92.87%)	205178 (0.00%)	3031071498 (44.29%)	6744689953	6583702452 (97.61%)	6286018383 (93.20%)	135313 (0.00%)	2966458023 (43.98%)
Y-160-3	7224941100	7043005861 (97.48%)	6723649711 (93.06%)	224270 (0.00%)	3191241383 (44.17%)	7150838311	6985198362 (97.68%)	6673431351 (93.32%)	145792 (0.00%)	3144457504 (43.97%)
Y-20-1	7393137000	7189089894 (97.24%)	6849272607 (92.64%)	229867 (0.00%)	3266069532 (44.18%)	7266725279	7090194296 (97.57%)	6762421009 (93.06%)	148140 (0.00%)	3181380902 (43.78%)
Y-20-2	6177048900	6007053662 (97.25%)	5725242923 (92.69%)	187512 (0.00%)	2737771619 (44.32%)	6065177439	5919671282 (97.60%)	5648601152 (93.13%)	121673 (0.00%)	2661636713 (43.88%)
Y-20-3	5830801500	5684230811 (97.49%)	5431190451 (93.15%)	181939 (0.00%)	2569744559 (44.07%)	5756729096	5626173694 (97.73%)	5380038061 (93.46%)	118754 (0.00%)	2521953597 (43.81%)
Y-220-1	5919950400	5763954317 (97.36%)	5499467673 (92.90%)	184877 (0.00%)	2619656609 (44.25%)	5847871973	5708154964 (97.61%)	5450898649 (93.21%)	120634 (0.00%)	2574874402 (44.03%)
Y-220-2	6130320900	5952854303 (97.11%)	5657913640 (92.29%)	188833 (0.00%)	2713808933 (44.27%)	6053651840	5892473275 (97.34%)	5605430233 (92.60%)	123212 (0.00%)	2664863571 (44.02%)
Y-220-3	6148894200	6012771279 (97.79%)	5771243534 (93.86%)	38165 (0.00%)	2715119516 (44.16%)	6068524497	5950584357 (98.06%)	5715694399 (94.19%)	37672 (0.00%)	2664450405 (43.91%)
Y-30-1	6339336900	6174177091 (97.39%)	5895416299 (93.00%)	197116 (0.00%)	2815170194 (44.41%)	6242776243	6099322984 (97.70%)	5829573025 (93.38%)	126646 (0.00%)	2752616798 (44.09%)
Y-30-2	7027056000	6844163743 (97.40%)	6529748947 (92.92%)	214898 (0.00%)	3107521756 (44.22%)	6947379284	6782159690 (97.62%)	6475212885 (93.20%)	141306 (0.00%)	3057067076 (44.00%)
Y-30-3	6811199700	6631163943 (97.36%)	6328070355 (92.91%)	211536 (0.00%)	3018398585 (44.32%)	6710084264	6552882378 (97.66%)	6259355708 (93.28%)	137288 (0.00%)	2953380983 (44.01%)
Y-40-1	7707728400	7507543108 (97.40%)	7164987529 (92.96%)	235136 (0.00%)	3395598561 (44.05%)	7616348789	7436009554 (97.63%)	7102228870 (93.25%)	154442 (0.00%)	3338374408 (43.83%)
Y-40-2	6625862400	6456730464 (97.45%)	6166593310 (93.07%)	202695 (0.00%)	2921920948 (44.10%)	6536107725	6385460921 (97.70%)	6103713189 (93.38%)	130929 (0.00%)	2864926465 (43.83%)
Y-40-3	6835500600	6665028412 (97.51%)	6369954430 (93.19%)	211946 (0.00%)	3013854080 (44.09%)	6752576207	6599912408 (97.74%)	6312515900 (93.48%)	137234 (0.00%)	2962384204 (43.87%)
Y-5-1	5987651100	5838960304 (97.52%)	5579546948 (93.18%)	184838 (0.00%)	2630066145 (43.92%)	5917240869	5783082934 (97.73%)	5529826197 (93.45%)	120269 (0.00%)	2586261424 (43.71%)
Y-5-2	6848696100	6694827801 (97.75%)	6403468212 (93.50%)	74387 (0.00%)	3007082724 (43.91%)	6771706274	6633242319 (97.96%)	6348413447 (93.75%)	72488 (0.00%)	2958765487 (43.69%)
Y-5-3	5468022000	5350816688 (97.86%)	5136933412 (93.95%)	34746 (0.00%)	2400853824 (43.91%)	5407345702	5302775316 (98.07%)	5093790513 (94.20%)	34356 (0.00%)	2362675460 (43.69%)
Y-60-1	5986564200	5835028242 (97.47%)	5572393871 (93.08%)	186351 (0.00%)	2641134133 (44.12%)	5923295418	5785576338 (97.67%)	5528990028 (93.34%)	120635 (0.00%)	2602191262 (43.93%)
Y-60-2	7492797300	7306616116 (97.52%)	6984457787 (93.22%)	230835 (0.00%)	3306876529 (44.13%)	7409353927	7241330067 (97.73%)	6926959998 (93.49%)	151497 (0.00%)	3254627319 (43.93%)
Y-60-3	7077009900	6891273010 (97.38%)	6575391185 (92.91%)	216622 (0.00%)	3133148519 (44.27%)	6979455749	6814311823 (97.63%)	6507603528 (93.24%)	140059 (0.00%)	3071234151 (44.00%)
Y-80-1	7394016600	7193809781 (97.29%)	6869287968 (92.90%)	224666 (0.00%)	3285965205 (44.44%)	7240611426	7072659182 (97.68%)	6762289228 (93.39%)	146808 (0.00%)	3180375381 (43.92%)
Y-80-2	6803829000	6617892864 (97.27%)	6316197526 (92.83%)	209445 (0.00%)	3016221263 (44.33%)	6671315614	6515491237 (97.66%)	6226386862 (93.33%)	135625 (0.00%)	2926828907 (43.87%)
Y-80-3	6100403100	5960842935 (97.71%)	5710004630 (93.60%)	39131 (0.00%)	2698977145 (44.24%)	5997034979	5879310337 (98.04%)	5637903917 (94.01%)	38486 (0.00%)	2628509424 (43.83%)
YL-1	6303842400	6170170502 (97.88%)	5926993561 (94.02%)	39950 (0.00%)	2812214297 (44.61%)	6229081725	6110700755 (98.10%)	5873567834 (94.29%)	39470 (0.00%)	2764798380 (44.39%)
YL-2	6106640400	5970864685 (97.78%)	5723780462 (93.73%)	31325 (0.00%)	2725359718 (44.63%)	6028395929	5908003593 (98.00%)	5667281634 (94.01%)	30956 (0.00%)	2675927792 (44.39%)
YL-3	5484088800	5346780679 (97.50%)	5105171331 (93.09%)	167403 (0.00%)	2441205203 (44.51%)	5434667053	5308774123 (97.68%)	5071804000 (93.32%)	109990 (0.00%)	2410464501 (44.35%)
m-10-1	5686937100	5543361921 (97.48%)	5295219080 (93.11%)	175201 (0.00%)	2507733507 (44.10%)	5607098329	5480509856 (97.74%)	5239837701 (93.45%)	115006 (0.00%)	2456188794 (43.80%)
m-10-2	5602633200	5477599781 (97.77%)	5253181033 (93.76%)	35867 (0.00%)	2462645116 (43.96%)	5523832594	5414758567 (98.03%)	5197418778 (94.09%)	35367 (0.00%)	2411421590 (43.65%)
m-10-3	6264594300	6107351583 (97.49%)	5832068861 (93.10%)	195242 (0.00%)	2746080338 (43.83%)	6201549008	6059547761 (97.71%)	5790202936 (93.37%)	126727 (0.00%)	2706631866 (43.64%)
m-120-1	6553124100	6386550387 (97.46%)	6096952733 (93.04%)	203305 (0.00%)	2892852058 (44.14%)	6484158704	6333299962 (97.67%)	6050364925 (93.31%)	130893 (0.00%)	2849454461 (43.94%)
m-120-2	6211362000	6049058715 (97.39%)	5768926822 (92.88%)	192755 (0.00%)	2740806443 (44.13%)	6134618272	5988316706 (97.62%)	5715731026 (93.17%)	123829 (0.00%)	2691761025 (43.88%)
m-120-3	5706715800	5561087461 (97.45%)	5307592399 (93.01%)	175510 (0.00%)	2515721542 (44.08%)	5640539834	5508552461 (97.66%)	5261604731 (93.28%)	115603 (0.00%)	2473773165 (43.86%)
m-160-1	7348513500	7168360344 (97.55%)	6849400267 (93.21%)	226480 (0.00%)	3224953814 (43.89%)	7264099805	7101367058 (97.76%)	6790546787 (93.48%)	146557 (0.00%)	3171763742 (43.66%)
m-160-2	7459194600	7268755247 (97.45%)	6936058059 (92.99%)	229944 (0.00%)	3272548179 (43.87%)	7379043489	7206211892 (97.66%)	6881405949 (93.26%)	150039 (0.00%)	3222314701 (43.67%)
m-160-3	7560906000	7368085814 (97.45%)	7034853810 (93.04%)	232884 (0.00%)	3324945335 (43.98%)	7463125411	7289331968 (97.67%)	6965479013 (93.33%)	150602 (0.00%)	3261994326 (43.71%)
m-20-1	5971480500	5816988048 (97.41%)	5550381177 (92.95%)	185883 (0.00%)	2631695290 (44.07%)	5895318334	5757759217 (97.67%)	5498432036 (93.27%)	119935 (0.00%)	2581740058 (43.79%)
m-20-2	6194733000	6039542951 (97.49%)	5768116658 (93.11%)	192592 (0.00%)	2729250417 (44.06%)	6109215513	5972515759 (97.76%)	5709250828 (93.45%)	122228 (0.00%)	2673202478 (43.76%)
m-20-3	6915541500	6739441272 (97.45%)	6435839467 (93.06%)	211406 (0.00%)	3052406533 (44.14%)	6816710978	6662440456 (97.74%)	6368002610 (93.42%)	137530 (0.00%)	2988803558 (43.85%)
m-220-1	5384977500	5277835690 (98.01%)	5074872373 (94.24%)	34238 (0.00%)	2378793490 (44.17%)	5325631232	5230099303 (98.21%)	5031962830 (94.49%)	33870 (0.00%)	2342042068 (43.98%)
m-220-2	6120340200	5986938148 (97.82%)	5745138368 (93.87%)	38826 (0.00%)	2703681866 (44.18%)	6038856566	5922403001 (98.07%)	5687659030 (94.18%)	38307 (0.00%)	2650830502 (43.90%)
m-220-3	6172833000	6012241454 (97.40%)	5736088908 (92.92%)	188416 (0.00%)	2728805127 (44.21%)	6087803028	5944885436 (97.65%)	5676576269 (93.25%)	124027 (0.00%)	2672607662 (43.90%)
m-30-1	7221083700	7004834400 (97.01%)	6647284211 (92.05%)	223743 (0.00%)	3180413570 (44.04%)	7110324076	6917109273 (97.28%)	6570291365 (92.40%)	142778 (0.00%)	3108232216 (43.71%)
m-30-2	5462268300	5324263435 (97.47%)	5084955644 (93.09%)	170036 (0.00%)	2389386714 (43.74%)	5407410912	5282168340 (97.68%)	5047817209 (93.35%)	111306 (0.00%)	2355826348 (43.57%)
m-30-3	5412594000	5274967571 (97.46%)	5035189071 (93.03%)	166294 (0.00%)	2369959148 (43.79%)	5347063361	5223757768 (97.69%)	4990101221 (93.32%)	107207 (0.00%)	2328944654 (43.56%)
m-40-1	6933568500	6747842261 (97.32%)	6433106329 (92.78%)	214775 (0.00%)	3047601706 (43.95%)	6839570788	6674065254 (97.58%)	6368367711 (93.11%)	138341 (0.00%)	2988001726 (43.69%)
m-40-2	7479244200	7290548932 (97.48%)	6964125343 (93.11%)	228854 (0.00%)	3279611210 (43.85%)	7394496308	7224867786 (97.71%)	6906171638 (93.40%)	148740 (0.00%)	3228600096 (43.66%)
m-40-3	7383422400	7189861715 (97.38%)	6856267866 (92.86%)	226824 (0.00%)	3237256603 (43.84%)	7306491145	7130662784 (97.59%)	6804391536 (93.13%)	147872 (0.00%)	3189921265 (43.66%)
m-5-1	6010287000	5880271565 (97.84%)	5645617590 (93.93%)	38344 (0.00%)	2646187102 (44.03%)	5942003000	5826902262 (98.06%)	5598099564 (94.21%)	37918 (0.00%)	2605269871 (43.84%)
m-5-2	6349479900	6194148206 (97.55%)	5921929274 (93.27%)	40289 (0.00%)	2803224028 (44.15%)	6265111478	6127440568 (97.80%)	5862809324 (93.58%)	39738 (0.00%)	2749682710 (43.89%)
m-5-3	6460966500	6289404300 (97.34%)	5997684089 (92.83%)	197038 (0.00%)	2846094379 (44.05%)	6384451413	6231360091 (97.60%)	5946754472 (93.14%)	128864 (0.00%)	2798412145 (43.83%)
m-60-1	6910890600	6741339649 (97.55%)	6445537764 (93.27%)	213201 (0.00%)	3041351876 (44.01%)	6814538587	6665340301 (97.81%)	6378552239 (93.60%)	137839 (0.00%)	2977290883 (43.69%)
m-60-2	8652871800	8430652593 (97.43%)	8054885944 (93.09%)	265465 (0.00%)	3806731151 (43.99%)	8505072559	8316232993 (97.78%)	7954033356 (93.52%)	173015 (0.00%)	3704571763 (43.56%)
m-60-3	7573161300	7370974002 (97.33%)	7036019295 (92.91%)	232079 (0.00%)	3334149466 (44.03%)	7438089881	7267581897 (97.71%)	6945159130 (93.37%)	149524 (0.00%)	3240563437 (43.57%)
m-80-1	5444493900	5331696034 (97.93%)	5125813953 (94.15%)	32738 (0.00%)	2400371592 (44.09%)	5362248488	5267478630 (98.23%)	5069196749 (94.53%)	32227 (0.00%)	2344698482 (43.73%)
m-80-2	6076026000	5957868061 (98.06%)	5729620781 (94.30%)	37515 (0.00%)	2675700521 (44.04%)	5997261502	5894910905 (98.29%)	5674128668 (94.61%)	37012 (0.00%)	2622670394 (43.73%)
m-80-3	6476073600	6336462413 (97.84%)	6082708968 (93.93%)	39622 (0.00%)	2873499112 (44.37%)	6352730855	6237795972 (98.19%)	5996776455 (94.40%)	38817 (0.00%)	2783311030 (43.81%)
*BF Before filter *AF After filter
